# Supplementary material for: Synthesis, structure, and spin crossover above room temperature of a mononuclear and related dinuclear double helicate iron(ii) complexes
Source: Royal Society of Chemistry journal article supplement (doi:10.1039/c6dt02766k), 2016-01-01
Supplement: c6dt02766k1.pdf [file c6dt02766k1.pdf]

## Supporting Information

### Synthesis, Structure, and Spin Crossover Above Room Temperature of a Mononuclear and Related Dinuclear Double Helicate Iron(II) Complexes

Hiroaki Hagiwara,<sup>\*a</sup> Tomoko Tanaka<sup>a</sup> and Shiori Hora<sup>b</sup>

<sup>a</sup> *Department of Chemistry, Faculty of Education, Gifu University, Yanagido 1-1, Gifu 501-1193, Japan*

<sup>b</sup> *Graduate School of Education, Gifu University, Yanagido 1-1, Gifu 501-1193, Japan*

#### Table of Contents

|                                                                                                                                                                                                                                                                                                                     |    |
|---------------------------------------------------------------------------------------------------------------------------------------------------------------------------------------------------------------------------------------------------------------------------------------------------------------------|----|
| <b>Fig. S1</b> TG/DTA curves of $[\text{Fe}^{\text{II}}(\text{L1}^{\text{Me}})_2](\text{PF}_6)_2$ ( <b>1</b> )                                                                                                                                                                                                      | S2 |
| <b>Fig. S2</b> TG/DTA curves of $[\text{Fe}^{\text{II}}_2(\text{L2}^{\text{C2}})_2](\text{PF}_6)_4 \cdot 5\text{H}_2\text{O} \cdot \text{MeCN}$ ( <b>2</b> )                                                                                                                                                        | S2 |
| <b>Fig. S3</b> The magnetic behaviour of desolvated sample <b>2'</b> in the form of the $\chi_{\text{M}}T$ vs. $T$ plots.                                                                                                                                                                                           | S3 |
| <b>Fig. S4</b> Heterochiral 2D structure of $[\text{Fe}^{\text{II}}(\text{L1}^{\text{Me}})_2](\text{PF}_6)_2$ ( <b>1</b> ) at 150 K                                                                                                                                                                                 | S3 |
| <b>Fig. S5</b> Heterochiral 2D layer of $[\text{Fe}^{\text{II}}_2(\text{L2}^{\text{C2}})_2](\text{PF}_6)_4 \cdot 5\text{H}_2\text{O} \cdot \text{MeCN}$ ( <b>2</b> ) at 120 K                                                                                                                                       | S4 |
| <b>Fig. S6</b> PXRD patterns of <b>2</b> at room temperature in different states                                                                                                                                                                                                                                    | S4 |
| <b>Table S1</b> X-ray Crystallographic Data for $[\text{Fe}^{\text{II}}(\text{L1}^{\text{Me}})_2](\text{PF}_6)_2$ ( <b>1</b> ) at 150 and 448 K and $[\text{Fe}^{\text{II}}_2(\text{L2}^{\text{C2}})_2](\text{PF}_6)_4 \cdot 5\text{H}_2\text{O} \cdot \text{MeCN}$ ( <b>2</b> ) at 120 K                           | S5 |
| <b>Table S2</b> Relevant coordination bond lengths (Å) and angles (°) for $[\text{Fe}^{\text{II}}(\text{L1}^{\text{Me}})_2](\text{PF}_6)_2$ ( <b>1</b> ) at 150 and 448 K and $[\text{Fe}^{\text{II}}_2(\text{L2}^{\text{C2}})_2](\text{PF}_6)_4 \cdot 5\text{H}_2\text{O} \cdot \text{MeCN}$ ( <b>2</b> ) at 120 K | S6 |
| <b>Table S3</b> Intermolecular contacts (Å) for $[\text{Fe}^{\text{II}}(\text{L1}^{\text{Me}})_2](\text{PF}_6)_2$ ( <b>1</b> ) at 150 and 448 K and $[\text{Fe}^{\text{II}}_2(\text{L2}^{\text{C2}})_2](\text{PF}_6)_4 \cdot 5\text{H}_2\text{O} \cdot \text{MeCN}$ ( <b>2</b> ) at 120 K                           | S7 |
| <b>References</b>                                                                                                                                                                                                                                                                                                   | S7 |

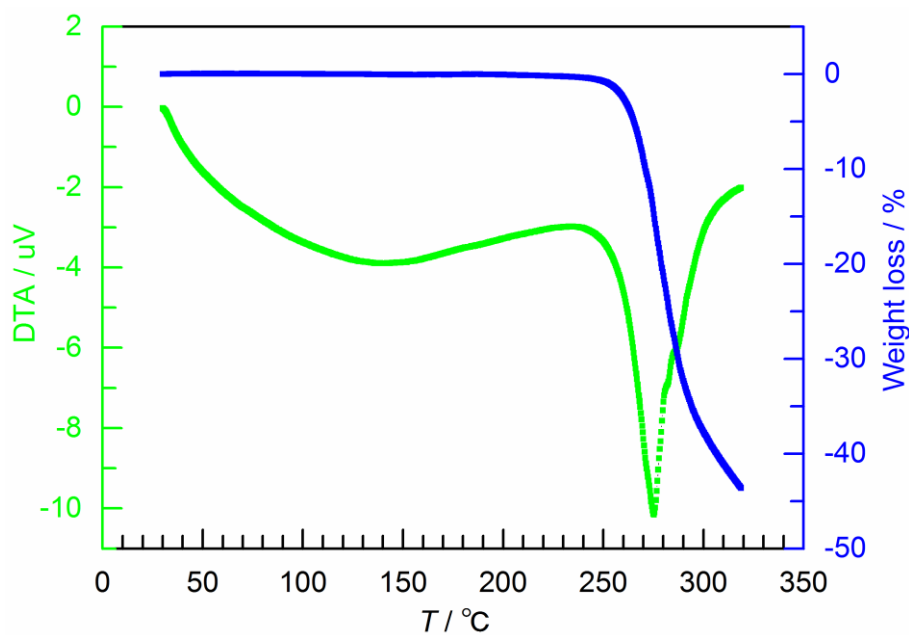

**Fig. S1** TG/DTA curves of  $[\text{Fe}^{\text{II}}(\text{L1}^{\text{Me}})_2](\text{PF}_6)_2$  (**1**).

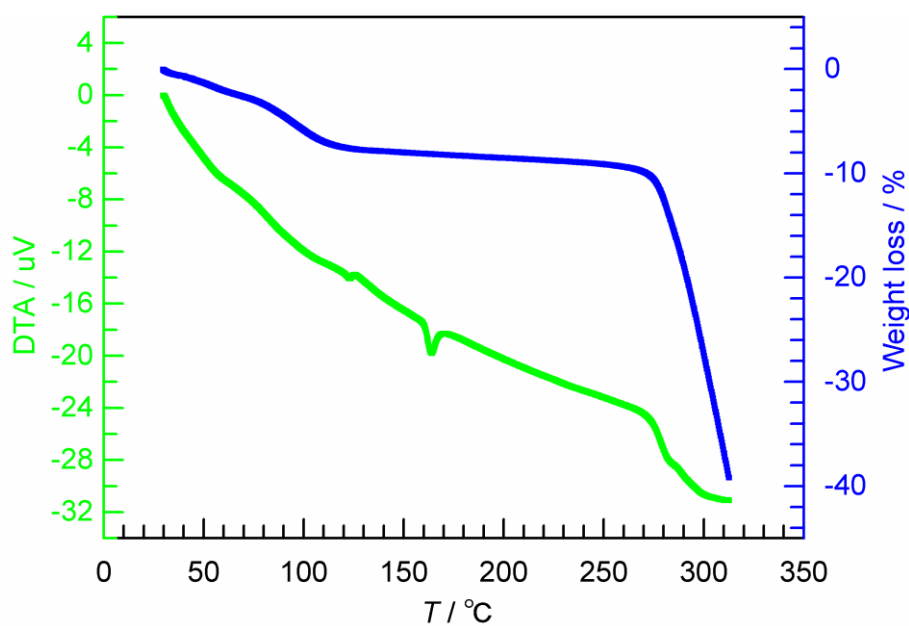

**Fig. S2** TG/DTA curves of  $[\text{Fe}^{\text{II}}_2(\text{L2}^{\text{C2}})_2](\text{PF}_6)_4 \cdot 5\text{H}_2\text{O} \cdot \text{MeCN}$  (**2**).

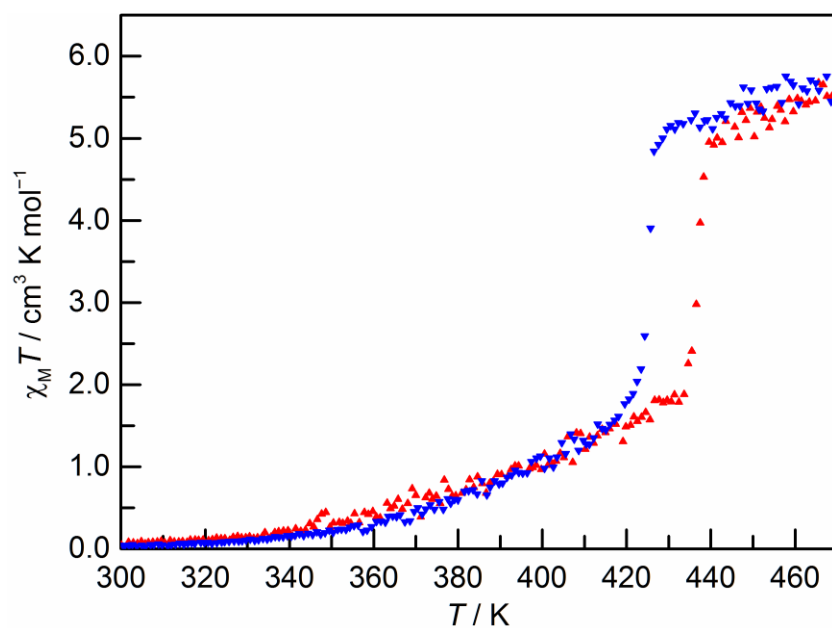

**Fig. S3** The magnetic behaviour of desolvated sample **2'** in the form of the  $\chi_M T$  vs.  $T$  plots. **2'** was warmed from 300 to 470 K (filled triangles; red), and then cooled from 470 to 300 K (filled inverted triangles; blue) at a sweep rate of  $1 \text{ K min}^{-1}$ .

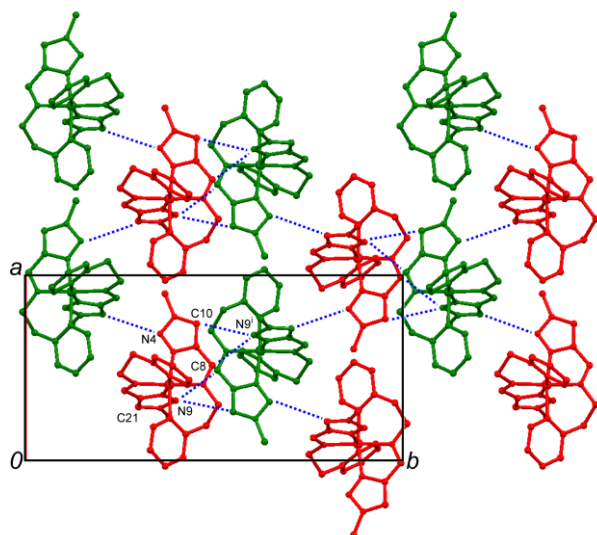

**Fig. S4** Heterochiral 2D structure of  $[\text{Fe}^{\text{II}}(\text{L1}^{\text{Me}})_2](\text{PF}_6)_2$  (**1**) at 150 K.  $\Delta$ - $[\text{Fe}^{\text{II}}(\text{L1}^{\text{Me}})_2]^{2+}$  (green) and  $\Lambda$ - $[\text{Fe}^{\text{II}}(\text{L1}^{\text{Me}})_2]^{2+}$  (red) enantiomers are linked alternately *via* CH...N hydrogen bonds (blue dotted line) and enantiomers of same chirality are not directly connected in a 2D layer.



**Table S1** X-ray Crystallographic Data for [Fe<sup>II</sup>(L1<sup>Me</sup>)<sub>2</sub>](PF<sub>6</sub>)<sub>2</sub> (**1**) at 150 and 448 K and [Fe<sup>II</sup><sub>2</sub>(L2<sup>C2</sup>)<sub>2</sub>](PF<sub>6</sub>)<sub>4</sub>·5H<sub>2</sub>O·MeCN (**2**) at 120 K

| Complex                                                          | Mononuclear <b>1</b>                                                              |            | Dinuclear <b>2</b> <sup>a</sup>                                                                |
|------------------------------------------------------------------|-----------------------------------------------------------------------------------|------------|------------------------------------------------------------------------------------------------|
|                                                                  | 150 K                                                                             | 448 K      | 120 K                                                                                          |
| Formula                                                          | C <sub>22</sub> H <sub>26</sub> N <sub>10</sub> P <sub>2</sub> F <sub>12</sub> Fe |            | C <sub>46</sub> H <sub>51</sub> N <sub>21</sub> P <sub>3</sub> F <sub>18</sub> Fe <sub>2</sub> |
| Formula weight                                                   | 776.32                                                                            |            | 1444.68                                                                                        |
| Crystal system                                                   | Monoclinic                                                                        |            | Monoclinic                                                                                     |
| Space group                                                      | P2 <sub>1</sub> /a                                                                |            | C2/c                                                                                           |
| <i>a</i> , Å                                                     | 12.1982(16)                                                                       | 12.647(3)  | 30.932(8)                                                                                      |
| <i>b</i> , Å                                                     | 21.725(3)                                                                         | 22.117(4)  | 20.020(5)                                                                                      |
| <i>c</i> , Å                                                     | 12.2925(16)                                                                       | 12.703(4)  | 11.614(3)                                                                                      |
| <i>β</i> , deg                                                   | 118.8092(12)                                                                      | 119.722(2) | 107.907(3)                                                                                     |
| <i>V</i> , Å <sup>3</sup>                                        | 2854.4(6)                                                                         | 3085.8(13) | 6844(3)                                                                                        |
| <i>Z</i>                                                         | 4                                                                                 | 4          | 4                                                                                              |
| <i>T</i> , K                                                     | 150(2)                                                                            | 448(2)     | 120 K(2)                                                                                       |
| <i>d</i> <sub>calcd</sub> , g cm <sup>-3</sup>                   | 1.806                                                                             | 1.671      | 1.402                                                                                          |
| <i>μ</i> , mm <sup>-1</sup>                                      | 0.756                                                                             | 0.699      | 0.591                                                                                          |
| <i>R</i> <sub>1</sub> <sup>b</sup> ( <i>I</i> >2σ( <i>I</i> ))   | 0.0404                                                                            | 0.0930     | 0.0956                                                                                         |
| w <i>R</i> <sub>2</sub> <sup>c</sup> ( <i>I</i> >2σ( <i>I</i> )) | 0.0967                                                                            | 0.2253     | 0.2032                                                                                         |
| <i>R</i> <sub>1</sub> <sup>b</sup> (all data)                    | 0.0442                                                                            | 0.1291     | 0.1358                                                                                         |
| w <i>R</i> <sub>2</sub> <sup>c</sup> (all data)                  | 0.0998                                                                            | 0.2449     | 0.2215                                                                                         |
| <i>S</i>                                                         | 1.064                                                                             | 1.434      | 1.001                                                                                          |
| CCDC number                                                      | 1491569                                                                           | 1491570    | 1491571                                                                                        |

<sup>a</sup> The PLATON SQUEEZE program<sup>1</sup> was used to treat regions having highly disordered solvent molecules and counter anions which could not be sensibly modelled in terms of atomic sites. Available void volume is 1386.1 Å<sup>3</sup>. 473 electrons per unit cell were located and these were assigned to 1 PF<sub>6</sub> and 5 H<sub>2</sub>O molecules per complex [473/4 = 119 e per complex; PF<sub>6</sub> (69) + 5 H<sub>2</sub>O (10) = 119 electrons].

<sup>b</sup>  $R_1 = \sum ||F_o| - |F_c|| / \sum |F_o|$ .

<sup>c</sup>  $wR_2 = [\sum w(|F_o^2| - |F_c^2|)^2 / \sum w|F_o^2|^2]^{1/2}$ .

**Table S2** Relevant coordination bond lengths (Å) and angles (°) for [Fe<sup>II</sup>(L1<sup>Me</sup>)<sub>2</sub>](PF<sub>6</sub>)<sub>2</sub> (**1**) at 150 and 448 K and [Fe<sup>II</sup><sub>2</sub>(L2<sup>C2</sup>)<sub>2</sub>](PF<sub>6</sub>)<sub>4</sub>·5H<sub>2</sub>O·MeCN (**2**) at 120 K

| Complex                                 | Mononuclear <b>1</b> |            | Dinuclear <b>2</b> |
|-----------------------------------------|----------------------|------------|--------------------|
| Temperature                             | 150 K                | 448 K      | 120 K              |
|                                         | Bond Lengths (Å)     |            |                    |
| Fe(1)-N(1)                              | 2.0170(16)           | 2.141(4)   | 2.017(7)           |
| Fe(1)-N(2)                              | 1.9718(16)           | 2.085(4)   | 1.953(5)           |
| Fe(1)-N(3)                              | 1.9915(16)           | 2.140(4)   | 1.926(5)           |
| Fe(1)-N(6) <sup>i</sup>                 | 2.0196(17)           | 2.107(5)   | 2.029(4)           |
| Fe(1)-N(7) <sup>i</sup>                 | 1.9814(17)           | 2.098(4)   | 1.952(6)           |
| Fe(1)-N(8) <sup>i</sup>                 | 1.9954(16)           | 2.167(4)   | 1.949(5)           |
| Average Fe-N                            | 1.996                | 2.123      | 1.971              |
|                                         | Bond Angles (deg)    |            |                    |
| N(1)-Fe-N(2)                            | 91.04(6)             | 88.23(16)  | 91.8(2)            |
| N(1)-Fe-N(3)                            | 171.42(7)            | 165.23(16) | 172.8(2)           |
| N(1)-Fe-N(6) <sup>i</sup>               | 88.80(7)             | 89.68(17)  | 90.6(2)            |
| N(1)-Fe-N(7) <sup>i</sup>               | 93.40(6)             | 97.69(16)  | 98.0(3)            |
| N(1)-Fe-N(8) <sup>i</sup>               | 88.54(7)             | 88.47(16)  | 91.7(2)            |
| N(2)-Fe-N(3)                            | 80.43(7)             | 77.07(15)  | 81.14(19)          |
| N(2)-Fe-N(6) <sup>i</sup>               | 95.73(7)             | 101.69(17) | 96.29(18)          |
| N(2)-Fe-N(7) <sup>i</sup>               | 171.84(7)            | 167.32(18) | 167.5(3)           |
| N(2)-Fe-N(8) <sup>i</sup>               | 93.52(7)             | 92.73(16)  | 91.94(18)          |
| N(3)-Fe-N(6) <sup>i</sup>               | 93.00(7)             | 94.62(16)  | 88.89(19)          |
| N(3)-Fe-N(7) <sup>i</sup>               | 94.95(6)             | 96.47(15)  | 89.2(2)            |
| N(3)-Fe-N(8) <sup>i</sup>               | 90.99(7)             | 90.81(15)  | 89.9(2)            |
| N(6) <sup>i</sup> -Fe-N(7) <sup>i</sup> | 91.21(7)             | 89.60(18)  | 91.4(2)            |
| N(6) <sup>i</sup> -Fe-N(8) <sup>i</sup> | 170.42(7)            | 165.40(16) | 171.4(2)           |
| N(7) <sup>i</sup> -Fe-N(8) <sup>i</sup> | 79.77(7)             | 76.31(18)  | 80.1(2)            |
| $\Sigma^a$                              | 46.3                 | 64.7       | 42.5               |
| $\Theta^b$                              | 132.8                | 208.8      | 133.7              |

<sup>a</sup>  $\Sigma$  = the sum of  $|90 - \varphi|$  for the 12 *cis* N-Fe-N angles in the octahedral coordination sphere.<sup>2</sup>

<sup>b</sup>  $\Theta$  = the sum of  $|60 - \theta|$  for the 24 N-Fe-N angles describing the trigonal twist angles.<sup>3</sup>

Symmetry operation relevant only to **2**: (i), 1 - x, y, 3/2 - z.

**Table S3** Intermolecular contacts (Å) for [Fe<sup>II</sup>(L1<sup>Me</sup>)<sub>2</sub>](PF<sub>6</sub>)<sub>2</sub> (**1**) at 150 and 448 K and [Fe<sup>II</sup><sub>2</sub>(L2<sup>C2</sup>)<sub>2</sub>](PF<sub>6</sub>)<sub>4</sub>·5H<sub>2</sub>O·MeCN (**2**) at 120 K

| Complex              | Temp. | C-H...X or X...X                      | <i>d</i> (C-H) | <i>d</i> (H...X) | <i>d</i> (C...X) | <(C-H...X) |
|----------------------|-------|---------------------------------------|----------------|------------------|------------------|------------|
| Mononuclear <b>1</b> | 150 K | C(8)-H(9)...N(9) <sup>i</sup>         | 0.950          | 2.648            | 3.393(2)         | 135.63     |
|                      |       | C(10)-H(10)...N(9) <sup>i</sup>       | 0.950          | 2.905            | 3.527(3)         | 124.16     |
|                      |       | C(21)-H(23)...N(4) <sup>ii</sup>      | 0.950          | 2.687            | 3.525(3)         | 147.47     |
|                      | 448 K | C(8)-H(9)...N(9) <sup>i</sup>         | 0.930          | 2.863            | 3.633(6)         | 141.02     |
|                      |       | C(21)-H(23)...N(4) <sup>ii</sup>      | 0.930          | 2.735            | 3.601(8)         | 155.46     |
| Dinuclear <b>2</b>   | 120 K | Cg1 <sup>c</sup> ...Cg1 <sup>ii</sup> |                |                  | 3.937(4)         |            |
|                      |       | C(1)...C(4) <sup>ii</sup>             |                |                  | 3.900(9)         |            |
|                      |       | C(2)...C(4) <sup>ii</sup>             |                |                  | 3.676(13)        |            |
|                      |       | C(2)...C(5) <sup>ii</sup>             |                |                  | 3.906(11)        |            |
|                      |       | C(3)...C(4) <sup>ii</sup>             |                |                  | 3.642(14)        |            |
|                      |       | C(3)...C(5) <sup>ii</sup>             |                |                  | 3.625(12)        |            |
|                      |       | C(3)...Cg1 <sup>ii</sup>              |                |                  | 3.730            |            |
|                      |       | C(4)...C(4) <sup>ii</sup>             |                |                  | 3.776(11)        |            |
|                      |       | C(4)...C(5) <sup>ii</sup>             |                |                  | 4.010(9)         |            |
|                      |       | C(4)...Cg1 <sup>ii</sup>              |                |                  | 3.604            |            |
|                      |       | C(11)-H(11)...Cg2 <sup>d,iii</sup>    | 0.990          | 3.681            | 3.991            | 101.09     |
|                      |       | C(11)-H(12)...Cg2 <sup>iii</sup>      | 0.989          | 3.452            | 3.991            | 116.44     |

<sup>c</sup> Cg1 = Centroid of the N1-C1-C2-C3-C4-C5 ring.

<sup>d</sup> Cg2 = Centroid of the N6-C12-C13-C14-C15-C16 ring.

Symmetry operations for **1**: (i), 1 - x, 1 - y, 1 - z; (ii), - 1/2 + x, 1/2 - y, z.

Symmetry operations for **2**: (ii), 1/2 - x, 1/2 - y, 1 - z; (iii), x, y, 1 + z.

## References

- 1 A. L. Spek, *Acta Cryst.*, 2015, **C71**, 9–18.
- 2 P. Guionneau, M. Marchivie, G. Bravic, J.-F. Létard and D. Chasseau, *Top. Curr. Chem.*, 2004, **234**, 97–128.
- 3 M. Marchivie, P. Guionneau, J.-F. Létard and D. Chasseau, *Acta Cryst.*, 2005, **B61**, 25–28.
